# Supplementary material for: The Agreement between Feline Pancreatic Lipase Immunoreactivity and DGGR-Lipase Assay in Cats—Preliminary Results
Source: Animals (Basel). 2021 Nov 6;11(11):3172. doi: 10.3390/ani11113172 (PMC8614432; doi:10.3390/ani11113172)
Supplement: Supplementary file 1 [file animals-11-03172-s001.zip › Table S1.xlsx]

## Sheet: Table S1
Cat	Greed	Sex	Age [years]	fPLI [μg/L]	DGGR lipase assay [U/L]	Creatinine [mg/dL]	Cholesterole [mg/dL]	Triglycerides [mg/dL]
1	Domestic shorthair	male	12	38.2	145	3	386	123
2	Domestic shorthair	male	12	3.5	43	1.8	179	300
3	Domestic shorthair	female	19	22	72	6.8	197	24
4	Devon rex	male	12	5.6	52	0.9	247	101
5	Domestic shorthair	male	14	1.3	47	2	169	32
6	Domestic shorthair	female	14	0.6	41	1.1	149	123
7	Domestic shorthair	female	17	50	181	1	219	166
8	Domestic shorthair	female	12	3.9	58	1.1	487	233
9	Domestic shorthair	male	11	1.4	45	0.9	218	67
10	Domestic shorthair	male	8	8.9	79	1.4	334	45
11	Domestic shorthair	male	14	22.7	52	8	290	576
12	Domestic shorthair	male	14	4.3	54	1.3	207	54
13	Domestic shorthair	male	10	2.1	41	1.1	309	45
14	Domestic shorthair	female	12	1.1	30	1	238	53
15	Domestic shorthair	female	13	1	35	1.3	148	152
16	Maine coon	male	5	0.9	18	1.3	175	85
17	Siberian	female	13	3.3	27	0.8	283	95
18	Sphinx	male	5	1	47	1	149	61
19	Sphinx	male	11	1.3	42	1.4	124	59
20	Sphinx	male	1	0.9	53	1	156	92
21	Sphinx	female	10	0.8	54	1	140	66
22	Domestic shorthair	male	15	13.1	90	2	263	53
23	Domestic shorthair	male	16	6.6	62	1	256	65
24	Domestic shorthair	male	9	1.2	53	1.4	353	851
25	British shorthair	female	11	6.9	75	1.9	230	65
26	Domestic shorthair	female	9	1.8	22	1.1	365	487
27	Domestic shorthair	female	9	1	45	1.3	143	62
28	Domestic shorthair	male	11	6.6	56	1.7	191	33
29	Domestic shorthair	female	7	2.1	32	1.5	116	633
30	Domestic shorthair	female	13	0.9	26	0.8	251	262
31	Siberian	male	12	4.1	63	1.2	319	108
32	Russian	female	18	2.6	17	1	206	30
33	Devon rex	male	8	0.8	29	1.8	188	39
34	Domestic shorthair	female	10	1.3	63	3.9	166	49
35	Domestic shorthair	male	14	2.4	49	1.9	146	25
36	Domestic shorthair	male	15	7.1	84	2.5	132	33
37	Domestic shorthair	male	12	38.2	145	3	386	123
38	Domestic shorthair	female	12	9.6	81	5.1	218	138
39	Russian	male	10	4.4	63	4	259	86
40	Domestic shorthair	female	9	10.5	31	1.5	185	103
41	Domestic shorthair	male	10	3.4	50	1	128	45
42	Domestic shorthair	female	12	6.7	38	1	123	79
43	Ragdoll	male	12	50	264	1.2	346	70
44	Domestic shorthair	female	8	1.9	20	1	147	106
45	Domestic shorthair	female	10	5.7	23	3.7	125	126
46	Domestic shorthair	male	13	3.2	26	1.1	176	17
47	Domestic shorthair	male	12	2.3	27	0.9	172	248
48	Domestic shorthair	male	15	36.7	142	1.5	306	65
49	Domestic shorthair	female	10	23.8	180	3.4	238	199
50	Maine coon	male	10	38.7	206	2.1	145	38
