# Supplementary material for: The Agreement between Feline Pancreatic Lipase Immunoreactivity and DGGR-Lipase Assay in Cats—Preliminary Results
Source: Animals (Basel). 2021 Nov 6;11(11):3172. doi: 10.3390/ani11113172 (PMC8614432; doi:10.3390/ani11113172)
Supplement: Supplementary file 1 [file animals-11-03172-s001.zip › Table S2.pdf]

Table S2. Calculation of the chance-corrected agreement

Contingency table presenting counts:

|        |   | Test 2          |                 | Totals          |
|--------|---|-----------------|-----------------|-----------------|
|        |   | +               | –               |                 |
| Test 1 | + | a               | b               | T1 <sub>+</sub> |
|        | – | c               | d               | T1 <sub>–</sub> |
| Totals |   | T2 <sub>+</sub> | T2 <sub>–</sub> | N               |

Contingency table presenting probabilities:

|        |   | Test 2                   |                          | Totals                   |
|--------|---|--------------------------|--------------------------|--------------------------|
|        |   | +                        | –                        |                          |
| Test 1 | + | p <sub>++</sub> = a/N    | p <sub>+–</sub> = b/N    | p <sub>+</sub> = (a+b)/N |
|        | – | p <sub>–+</sub> = c/N    | p <sub>––</sub> = d/N    | p <sub>–</sub> = (c+d)/N |
| Totals |   | p <sub>+</sub> = (a+c)/N | p <sub>–</sub> = (b+d)/N | (a+b+c+d)/N = 100%       |

Calculation of the expected chance agreement (P<sub>e</sub>) according to Cohen (1960):

$$P_e(\kappa) = \frac{T1_+ \times T2_+ + T1_- \times T2_-}{N^2} = p_{+} \times p_{+} + p_{-} \times p_{-} = (p_{+} + p_{+}) + (1 - p_{+}) \times (1 - p_{+})$$

Calculation of the expected chance agreement (P<sub>e</sub>) according to Gwet (2002, 2008):

$$\begin{aligned} P_e(\gamma) &= 2 \times \left( \frac{(T1_+ + T2_+)/2}{N} \right) \times \left( \frac{(T1_- + T2_-)/2}{N} \right) = 2 \times \frac{(p_{+} + p_{+})}{2} \times \frac{(p_{-} + p_{-})}{2} \\ &= 2 \times \frac{(p_{+} + p_{+})}{2} \times \left( 1 - \frac{p_{+} + p_{+}}{2} \right) = \frac{(p_{+} + p_{+}) \times (p_{-} + p_{-})}{2} \\ &= \frac{(p_{+} + p_{+}) \times [2 - (p_{+} + p_{+})]}{2} \end{aligned}$$

Calculation of the observed agreement (P<sub>o</sub>):

$$P_o = \frac{a + d}{N} = p_{++} + p_{--}$$

Calculation of the chance-corrected (beyond chance) agreement:

$$AC_1 = \frac{P_o - P_e}{1 - P_e} = 1 - \frac{1 - P_o}{1 - P_e}$$
