# Supplementary material for: The Agreement between Feline Pancreatic Lipase Immunoreactivity and DGGR-Lipase Assay in Cats—Preliminary Results
Source: Animals (Basel). 2021 Nov 6;11(11):3172. doi: 10.3390/ani11113172 (PMC8614432; doi:10.3390/ani11113172)
Supplement: Supplementary file 1 [file animals-11-03172-s001.zip › Table S3.pdf]

Table S3. Agreement between feline pancreatic lipase immunoreactivity (fPLI) and DGGR lipase assay

**Optimal cut-off values for DGGR lipase assay:**

|                         |           | fPLI [ $\mu\text{g/L}$ ] |            | Totals |
|-------------------------|-----------|--------------------------|------------|--------|
|                         |           | > 3.5                    | $\leq 3.5$ |        |
| DGGR lipase assay [U/L] | > 55      | 18                       | 1          | 19     |
|                         | $\leq 55$ | 6                        | 25         | 31     |
| Totals                  |           | 24                       | 26         | 50     |

Gwet's  $AC_1$  ( $\gamma$ ) coefficient = 0.725 (CI 95%: 0.537, 0.914)

Cohen's kappa ( $\kappa$ ) coefficient = 0.717 (CI 95%: 0.523, 0.912)

|                         |           | fPLI [ $\mu\text{g/L}$ ] |            | Totals |
|-------------------------|-----------|--------------------------|------------|--------|
|                         |           | > 5.3                    | $\leq 5.3$ |        |
| DGGR lipase assay [U/L] | > 70      | 13                       | 0          | 13     |
|                         | $\leq 70$ | 7                        | 30         | 37     |
| Totals                  |           | 20                       | 30         | 50     |

Gwet's  $AC_1$  ( $\gamma$ ) coefficient = 0.749 (CI 95%: 0.577, 0.921)

Cohen's kappa ( $\kappa$ ) coefficient = 0.690 (CI 95%: 0.477, 0.903)

**Cut-off values for DGGR lipase assay used by the veterinary laboratory:**

|                         |           | fPLI [ $\mu\text{g/L}$ ] |            | Totals |
|-------------------------|-----------|--------------------------|------------|--------|
|                         |           | > 3.5                    | $\leq 3.5$ |        |
| DGGR lipase assay [U/L] | > 45      | 21                       | 8          | 29     |
|                         | $\leq 45$ | 3                        | 18         | 21     |
| Totals                  |           | 24                       | 26         | 50     |

Gwet's  $AC_1$  ( $\gamma$ ) coefficient = 0.562 (CI 95%: 0.333, 0.790)

Cohen's kappa ( $\kappa$ ) coefficient = 0.563 (CI 95%: 0.335, 0.791)

|                         |           | fPLI [ $\mu\text{g/L}$ ] |            | Totals |
|-------------------------|-----------|--------------------------|------------|--------|
|                         |           | > 5.3                    | $\leq 5.3$ |        |
| DGGR lipase assay [U/L] | > 45      | 17                       | 12         | 29     |
|                         | $\leq 45$ | 3                        | 18         | 21     |
| Totals                  |           | 20                       | 30         | 50     |

Gwet's  $AC_1$  ( $\gamma$ ) coefficient = 0.400 (CI 95%: 0.146, 0.654)

Cohen's kappa ( $\kappa$ ) coefficient = 0.419 (CI 95%: 0.172, 0.665)

**Cut-off values for DGGR lipase assay recommended by the manufacturer:**

|                         |           | fPLI [ $\mu\text{g/L}$ ] |            | Totals |
|-------------------------|-----------|--------------------------|------------|--------|
|                         |           | $> 3.5$                  | $\leq 3.5$ |        |
| DGGR lipase assay [U/L] | $> 60$    | 16                       | 1          | 17     |
|                         | $\leq 60$ | 8                        | 25         | 33     |
| Totals                  |           | 24                       | 26         | 50     |

Gwet's  $AC_1$  ( $\gamma$ ) coefficient = 0.651 (CI 95%: 0.445, 0.858)

Cohen's kappa ( $\kappa$ ) coefficient = 0.635 (CI 95%: 0.420, 0.851)

|                         |           | fPLI [ $\mu\text{g/L}$ ] |            | Totals |
|-------------------------|-----------|--------------------------|------------|--------|
|                         |           | $> 5.3$                  | $\leq 5.3$ |        |
| DGGR lipase assay [U/L] | $> 60$    | 14                       | 3          | 17     |
|                         | $\leq 60$ | 6                        | 27         | 33     |
| Totals                  |           | 20                       | 30         | 50     |

Gwet's  $AC_1$  ( $\gamma$ ) coefficient = 0.663 (CI 95%: 0.463, 0.862)

Cohen's kappa ( $\kappa$ ) coefficient = 0.615 (CI 95%: 0.388, 0.843)

**Cut-off values for DGGR lipase assay reported in the literature:**

|                         |           | fPLI [ $\mu\text{g/L}$ ] |            | Totals |
|-------------------------|-----------|--------------------------|------------|--------|
|                         |           | $> 3.5$                  | $\leq 3.5$ |        |
| DGGR lipase assay [U/L] | $> 26$    | 23                       | 20         | 43     |
|                         | $\leq 26$ | 1                        | 6          | 7      |
| Totals                  |           | 24                       | 26         | 50     |

Gwet's  $AC_1$  ( $\gamma$ ) coefficient = 0.247 (CI 95%: 0.002, 0.492)

Cohen's kappa ( $\kappa$ ) coefficient = 0.184 (CI 95%: -0.008, 0.449)

|                         |           | fPLI [ $\mu\text{g/L}$ ] |            | Totals |
|-------------------------|-----------|--------------------------|------------|--------|
|                         |           | $> 5.3$                  | $\leq 5.3$ |        |
| DGGR lipase assay [U/L] | $> 26$    | 19                       | 24         | 43     |
|                         | $\leq 26$ | 1                        | 6          | 7      |
| Totals                  |           | 20                       | 30         | 50     |

Gwet's  $AC_1$  ( $\gamma$ ) coefficient = 0.063 (CI 95%: -0.196, 0.323)

Cohen's kappa ( $\kappa$ ) coefficient = 0.126 (CI 95%: -0.116, 0.368)
